# Supplementary material for: Pogostone attenuates adipose tissue inflammation by regulating the adipocyte–macrophage crosstalk via activating SIRT1
Source: Royal Society of Chemistry journal article supplement (doi:10.1039/d2fo01450e), 2022-01-01
Supplement: d2fo01450e1.pdf [file d2fo01450e1.pdf]

## Supplementary material

### **Pogostone attenuates adipose tissue inflammation by regulating the adipocytes-macrophages crosstalk via activating SIRT1**

Dan Li<sup>a</sup>, Ziwei Xing<sup>a</sup>, Tingting Yu<sup>a</sup>, Wei Dong<sup>a</sup>, Zhiwei Wang<sup>b</sup>, Cheng Peng<sup>a,\*</sup>, Chao Yang<sup>b,\*</sup>

<sup>a</sup> State Key Laboratory of Southwestern Chinese Medicine Resources, School of Pharmacy, Chengdu University of Traditional Chinese Medicine, Chengdu, China

<sup>b</sup> National Engineering Research Center for Marine Aquaculture, Institute of Innovation & Application, Zhejiang Ocean University, Zhoushan, China

\*Correspondence

Cheng Peng, State Key Laboratory of Southwestern Characteristic Chinese Medicine Resources, School of Pharmacy, Chengdu University of Traditional Chinese Medicine, Chengdu, China; E-mail: [pengcheng\\_cd@126.com](mailto:pengcheng_cd@126.com).

Chao Yang, National Engineering Research Center for Marine Aquaculture, Institute of Innovation & Application, Zhejiang Ocean University, Zhoushan, Zhejiang Province, 316022, China; E-mail: [yc52028@hotmail.com](mailto:yc52028@hotmail.com).

**Table S1. List of oligonucleotide primer pairs used in qRT-PCR.**

| Gene                            | Forward                  | Reverse                   |
|---------------------------------|--------------------------|---------------------------|
| <i>18S</i>                      | AGCCTGCGGCTTAATTTGAC     | CAACTAAGAACGGCCATGCA      |
| <i>Ccl5</i>                     | TGCAGAGGACTCTGAGACAGC    | GAGTGGTGTCCGAGCCATA       |
| <i>Ccl11</i>                    | AGAGCTCCACAGCGCTTCT      | GCAGGAAGTTGGGATGGA        |
| <i>Cd11c</i>                    | CTGGATAGCCTTTCTTCTGCTG   | GCACACTGTGTCCGAACTC       |
| <i>Cd206</i>                    | CAGGTGTGGGCTCAGGTAGT     | TGTGGTGAGCTGAAAGGTGA      |
| <i>Cd68</i>                     | CCTTATGGACAGCTTACCTTTGG  | CTGAGCAGCCTGTAGCCTTAGAG   |
| <i>Cox-2</i>                    | CCACCTCTGCGATGCTCTTC     | CATCCCCACGGTTTTGACATG     |
| <i>Cx3cl1</i>                   | CATCCGCTATCAGCTAAACCA    | CAGAAGCGTCTGTGCTGTGT      |
| <i>Cxcl10</i>                   | GCTGCCGTCATTTTCTGC       | TCTCACTGGCCCGTCATC        |
| <i>Il-1<math>\beta</math></i>   | TGTTCTTTGAAGTTGACGGACCC  | TCATCTCGGAGCCTGTAGTGC     |
| <i>Il-6</i>                     | CCAGAGATACAAAGAAATGATGG  | ACTCCAGAAGACCAGAGGAAAT    |
| <i>IL-10</i>                    | CACAAAGCAGCCTTGCAGAA     | AGAGCAGGCAGCATAGCAGTG     |
| <i>iNos</i>                     | CCAAGCCCTCACCTACTTCC     | CTCTGAGGGCTGACACAAGG      |
| <i>Mcp-1</i>                    | CAACTCTCACTGAAGCCAGCTC   | TAGCTCTCCAGCCTACTCATTGG   |
| <i>Mip-1<math>\alpha</math></i> | CTTCTCTGTACCATGACACTCTGC | ATTCAGTTCCAGGTCAGTGATGTAT |
| <i>Tnf-<math>\alpha</math></i>  | GAGAAAGTCAACCTCCTCTCTG   | GAAGACTCCTCCCAGGTATATG    |

**Table S2. Antibodies used for Western blot and flow cytometry.**

| Antibody                                         | Source | Vendor                       | Catalog No. |
|--------------------------------------------------|--------|------------------------------|-------------|
| anti-phospho-JNK (Thr183/Tyr185)                 | Mouse  | Santa Cruz Biotechnology     | sc-6254     |
| anti-JNK                                         | Rabbit | Santa Cruz Biotechnology     | sc-571      |
| anti-phospho-p38 (Thr180/Tyr182)                 | Rabbit | Cell Signaling<br>Technology | #4511       |
| anti-p38                                         | Rabbit | Cell Signaling<br>Technology | #8690       |
| anti-phospho-ERK<br>(Thr202/Tyr204)              | Rabbit | Cell Signaling<br>Technology | #4370       |
| anti-ERK                                         | Rabbit | Cell Signaling<br>Technology | #4695       |
| anti-phospho-p65 (Ser536)                        | Rabbit | Cell Signaling<br>Technology | #3033       |
| anti- p65                                        | Rabbit | Cell Signaling<br>Technology | #8242       |
| anti-phospho-IKK $\alpha$ / $\beta$ (Ser176/180) | Rabbit | Cell Signaling<br>Technology | #2697       |
| anti-IKK $\alpha$                                | Mouse  | Cell Signaling<br>Technology | #11930      |
| anti-IKK $\beta$                                 | Rabbit | Cell Signaling<br>Technology | #8943       |
| anti-phospho-I $\kappa$ B $\alpha$ (Ser32)       | Rabbit | Cell Signaling<br>Technology | #2859       |
| anti-I $\kappa$ B $\alpha$                       | Mouse  | Cell Signaling<br>Technology | #4814       |
| anti-iNOS                                        | Rabbit | Cell Signaling<br>Technology | #13120      |
| anti-COX2                                        | Rabbit | Cell Signaling<br>Technology | #12282      |
| anti-SIRT3                                       | Rabbit | Cell Signaling<br>Technology | #5490       |
| $\alpha$ -tubulin                                | Mouse  | Santa Cruz Biotechnology     | sc-8035     |
| $\beta$ -actin                                   | Rabbit | Cell Signaling<br>Technology | #8457       |

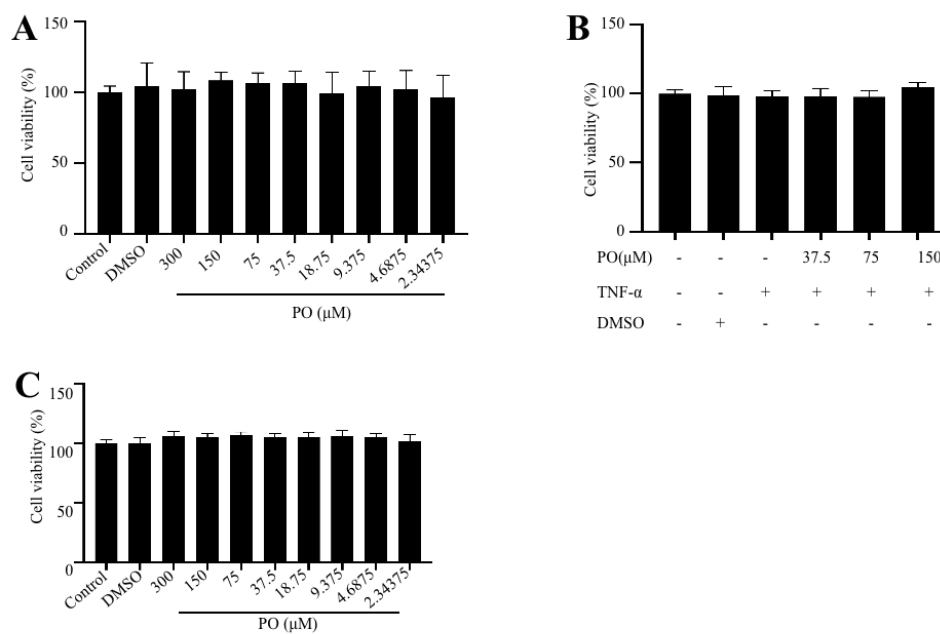

**Fig. S1. Cytotoxicity of pogostone (PO) on cells.** (A) Cell viability of PO on 3T3-L1 cells. (B) The cytotoxicity of PO on 3T3-L1 adipocytes with TNF- $\alpha$ . (C) Cell viability of PO on RAW264.7 macrophages. Cell viability was determined by MTT assay. Data are normalized to the mean value of control group. Data are expressed as means  $\pm$  SD (n = 6).
